# Supplementary material for: Time-resolved XAS/MS/Raman monitoring of mutual copper self-reduction and ethanol dehydrogenation reactions
Source: Royal Society of Chemistry journal article supplement (doi:10.1039/c5ra27403f), 2016-01-01
Supplement: c5ra27403f1.pdf [file c5ra27403f1.pdf]

### Electronic Supplementary Information

**Figure ESI1:** Pore size distributions of the alumina and 20Cu/Al samples obtained by Hg intrusion porosimetry.

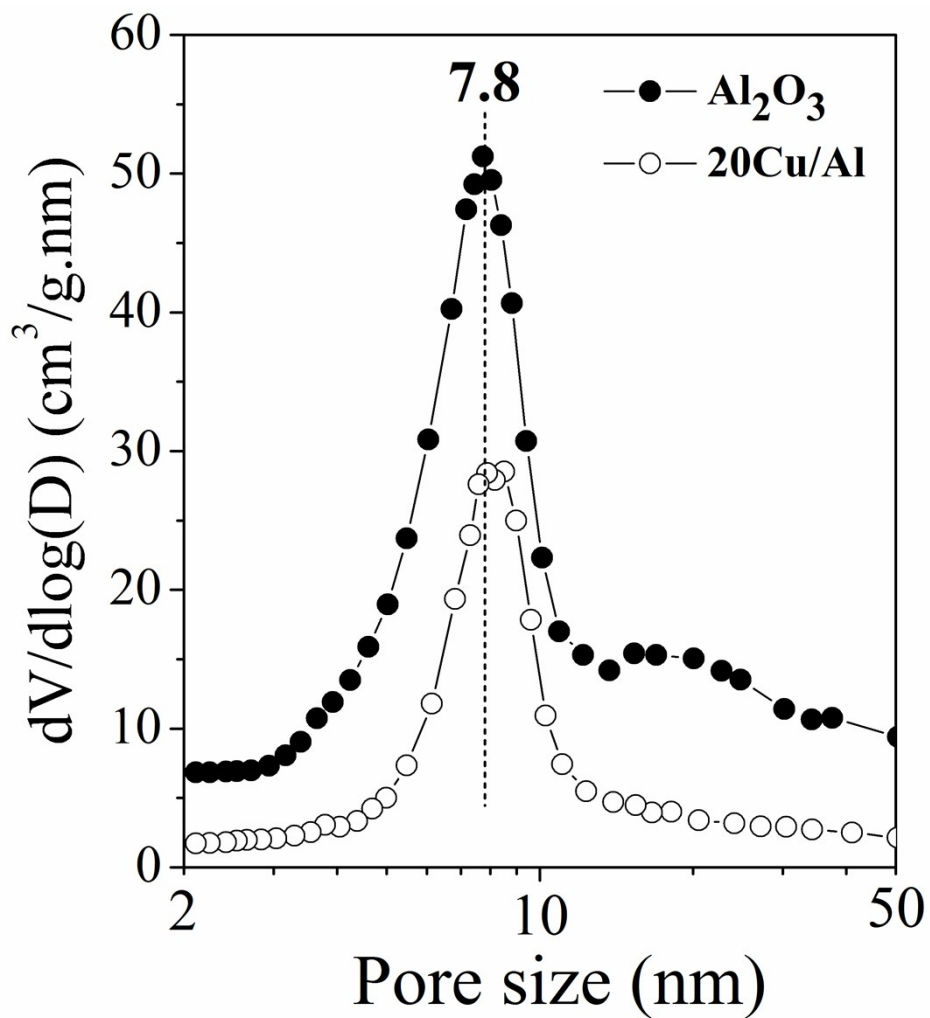

**Figure ESI2:** Raman spectra obtained for unreduced 20Cu/Al<sub>2</sub>O<sub>3</sub> catalyst during the ethanol dehydrogenation reaction between 200 and 400 °C. (a) Raman bands corresponding to the ethanol decomposition (2865 cm<sup>-1</sup>), and (b) hydrogen formation (585 cm<sup>-1</sup>).

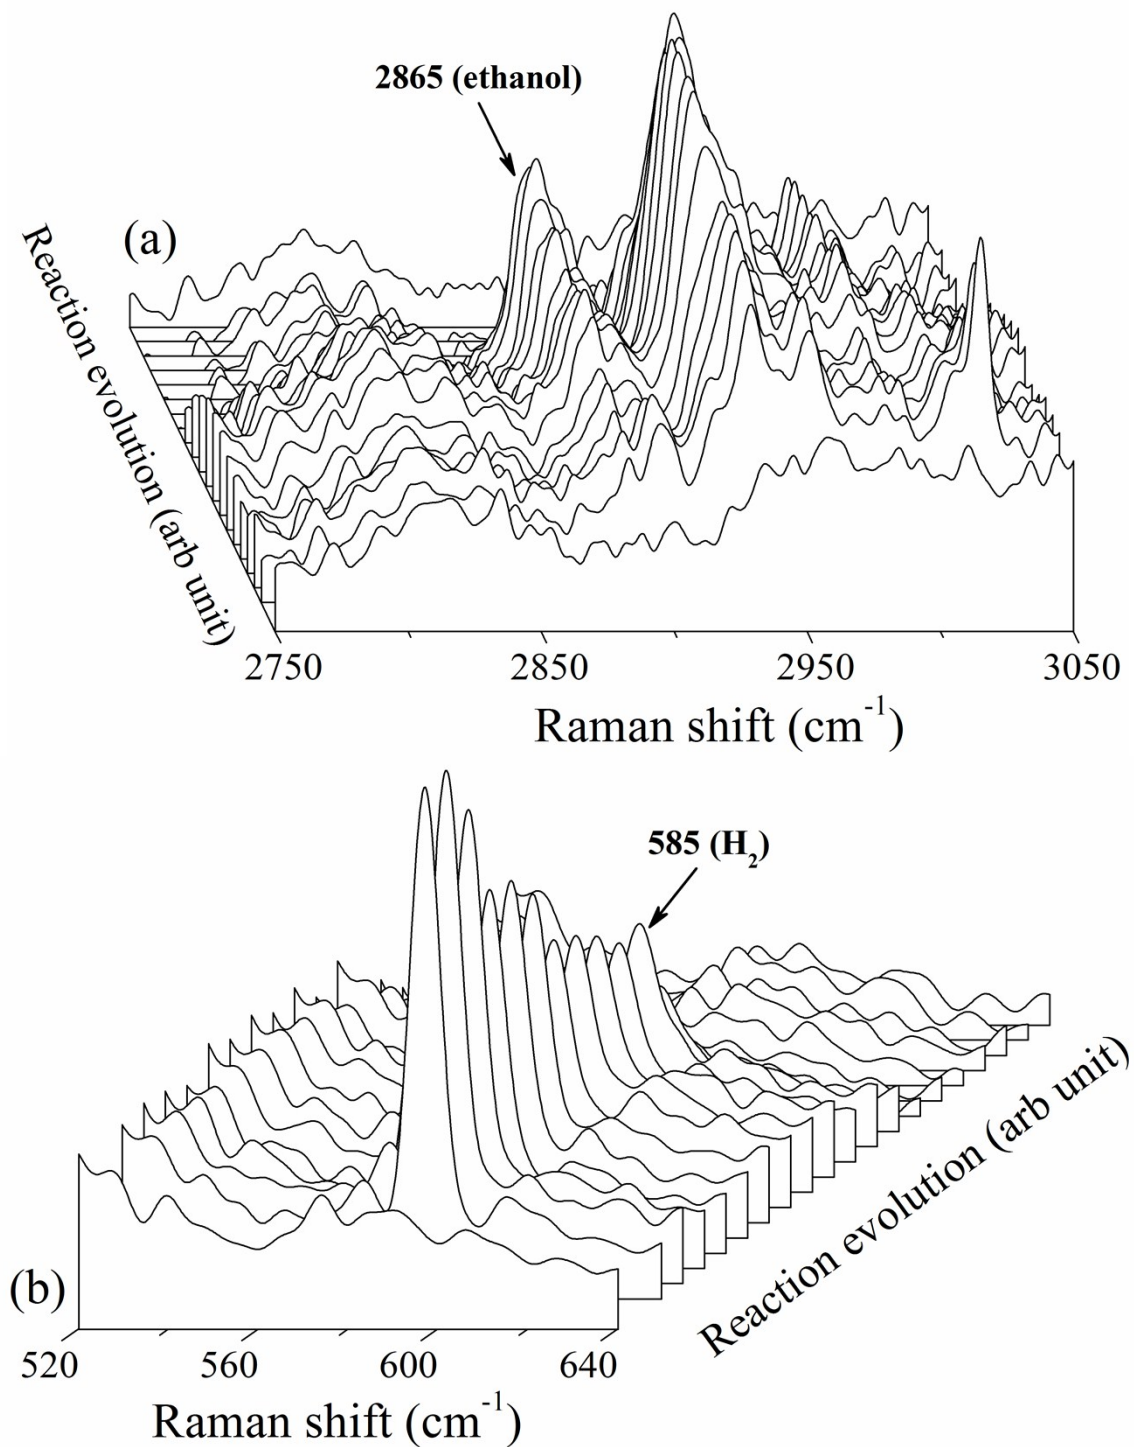

**Figure ESI3:** (a) Copper speciation, and (b) distribution of products with ethanol on stream during the ethanol dehydrogenation reaction between 200 and 400 °C for reduced 20Cu/Al<sub>2</sub>O<sub>3</sub> catalyst. Copper speciation and product selectivity were obtained by time-resolved Cu K-edge XANES measurements and mass spectrometry, respectively.

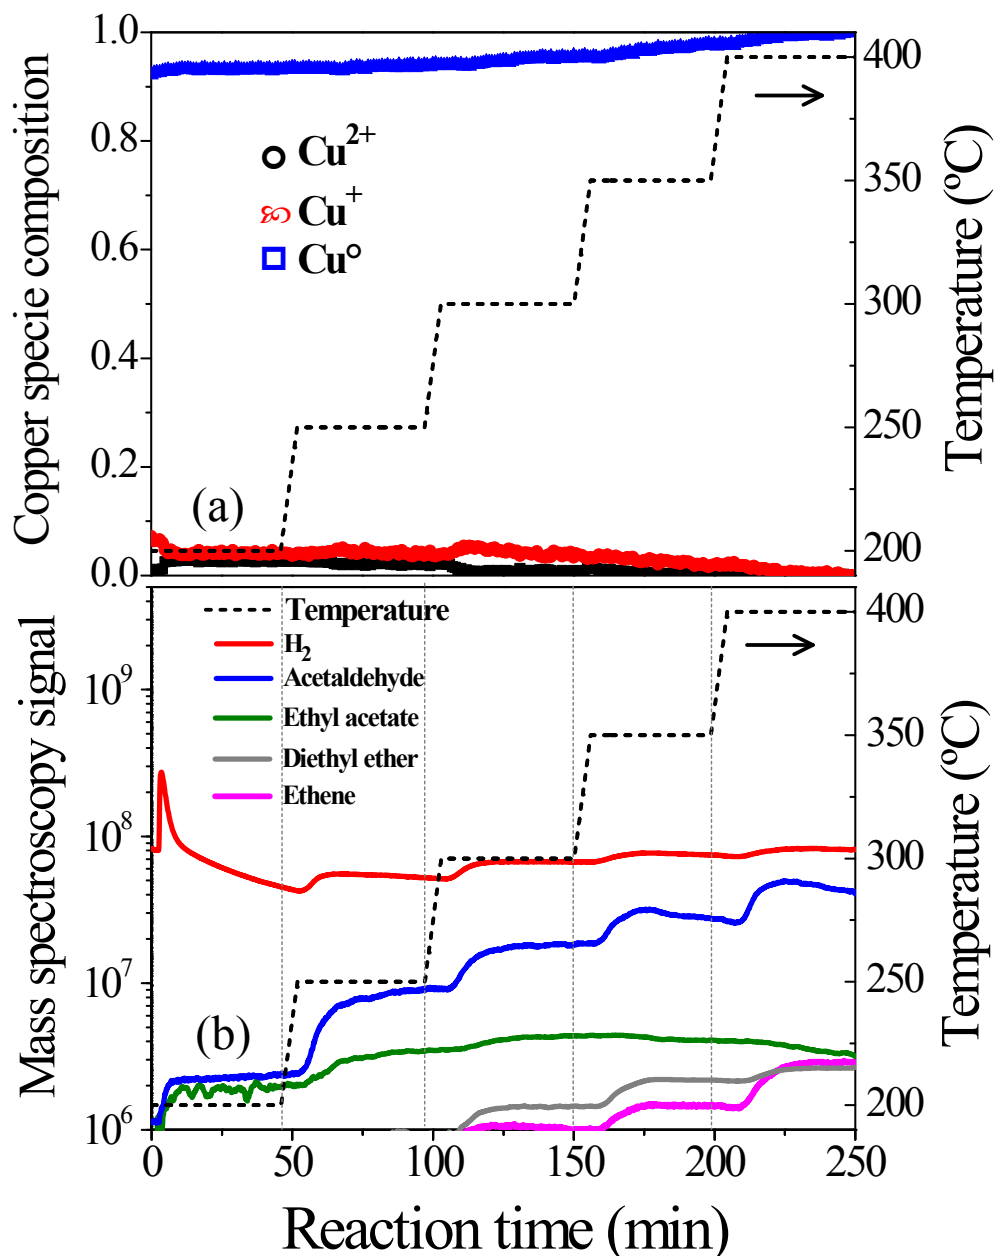

**Figure ESI4:** (a) Copper speciation, (b) selectivity to H<sub>2</sub>, acetaldehyde and ethyl acetate, and (c) derivative of H<sub>2</sub> and acetaldehyde formation during the ethanol dehydrogenation reaction between 200 and 300 °C. Copper speciation and product selectivity were obtained from time-resolved Cu K-edge XANES measurements and mass spectrometry, respectively.

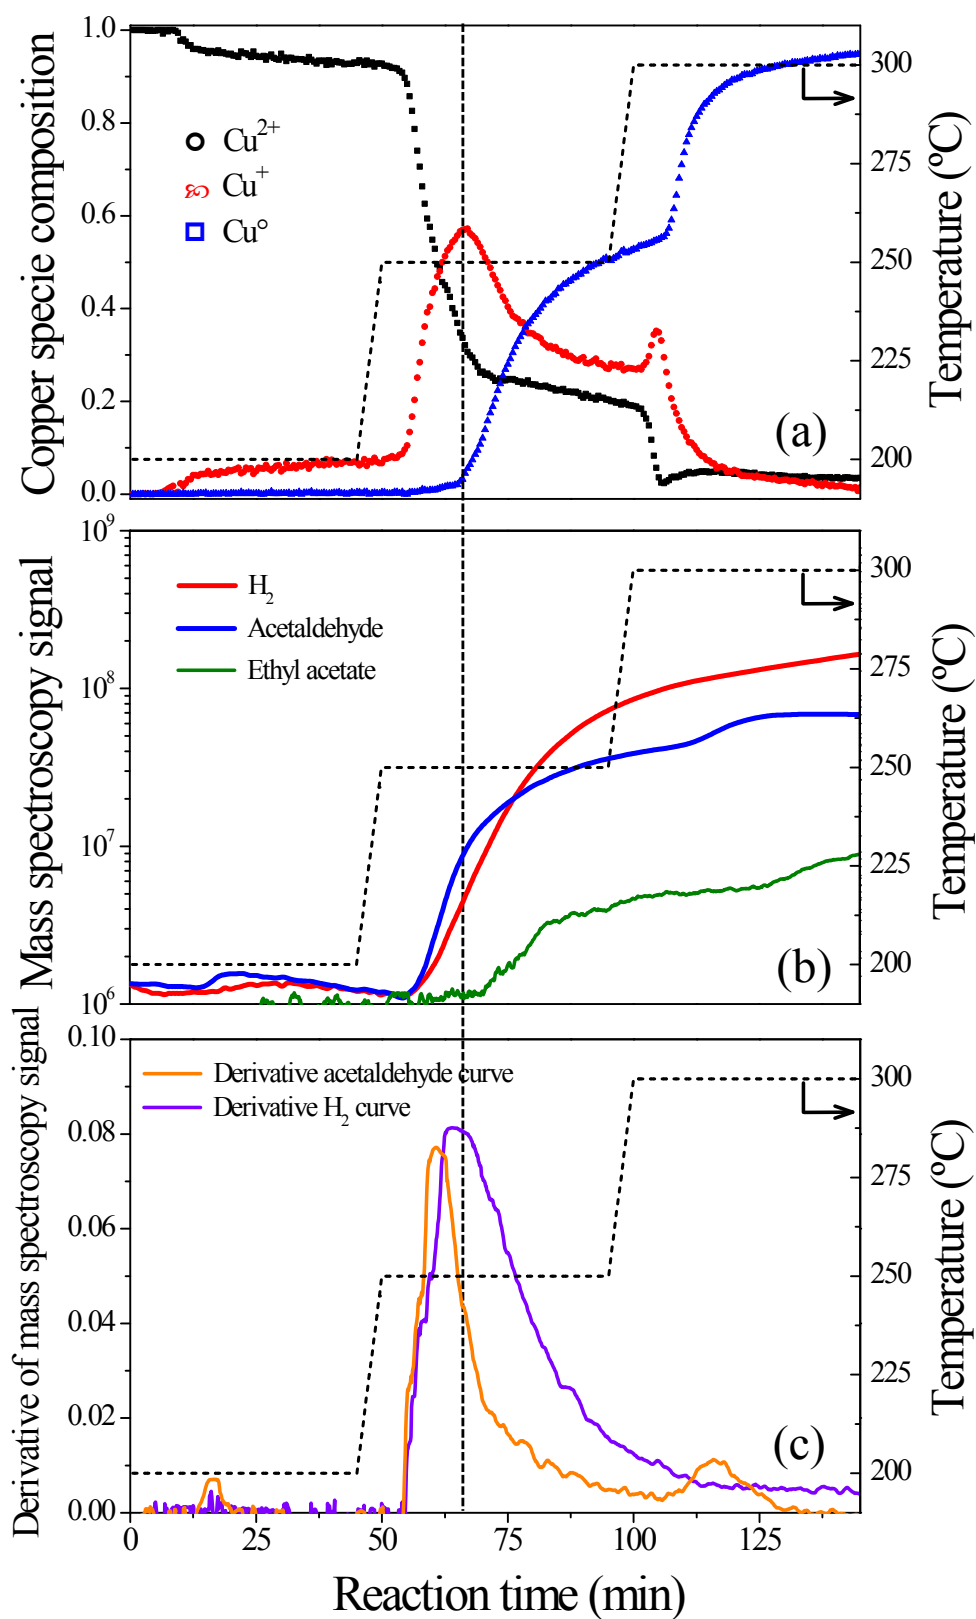

**Table ESI1:** Mass fragments and Raman band positions of gaseous products analyzed at the reactor outlet.

| Mass spectrometry |                | Raman spectroscopy |                              |
|-------------------|----------------|--------------------|------------------------------|
| Molecules         | m/z            | Molecules          | Position (cm <sup>-1</sup> ) |
| H <sub>2</sub>    | 2              | Ethanol            | 2865                         |
| Acetaldehyde      | <b>44</b> , 43 | H <sub>2</sub>     | <b>575</b> , 4114            |
| Ethyl acetate     | 61             | Ethene             | 3004                         |
| Diethyl ether     | <b>59</b> , 58 | H <sub>2</sub> O   | 3632                         |
| Ethene            | 28, <b>27</b>  |                    |                              |
| H <sub>2</sub> O  | <b>18</b> , 17 |                    |                              |

\*Main mass fragments and Raman bands used are in bold.
